# Supplementary material for: Pathological Nodal Staging Score for Gastric Signet Ring Cell Carcinoma: A Clinical Tool of Adequate Nodal Staging
Source: MDPI journal article supplement (doi:10.3390/diagnostics12102289), 2022-09-22
Supplement: s1 [file s1]

Supplementary Materials

# Pathological Nodal Staging Score for Gastric Signet Ring Cell Carcinoma: A Clinical Tool of Adequate Nodal Staging

Chaoran Yu <sup>†</sup>, Zhiyuan Zhou <sup>†</sup>, Bin Liu, Danhua Yao, Yuhua Huang, Pengfei Wang and Yousheng Li <sup>\*</sup>

Department of General Surgery, Shanghai Ninth People's Hospital, Shanghai Jiao Tong University School of Medicine, Shanghai 200025, China

<sup>\*</sup> Correspondence: guttx@hotmail.com

<sup>†</sup> These authors contributed equally to this work.

**Table S1.** Characterization of GSRCC patients divided into elderly (age $\geq$ 70), young (age $<$ 45) and rest groups.

|                    | Level                        | Rest Group (45 $\leq$<br>Age $<$ 70) | Elder GSRCC<br>(Age $\geq$ 70) | Young GSRCC<br>(Age $<$ 45) | <i>p</i> |
|--------------------|------------------------------|--------------------------------------|--------------------------------|-----------------------------|----------|
| n                  |                              | 308                                  | 182                            | 71                          |          |
| T_stage (%)        | T1                           | 57 ( 18.5)                           | 41 ( 22.5)                     | 18 ( 25.4)                  | 0.896    |
|                    | T2                           | 34 ( 11.0)                           | 19 ( 10.4)                     | 7 ( 9.9)                    |          |
|                    | T3                           | 100 ( 32.5)                          | 55 ( 30.2)                     | 21 ( 29.6)                  |          |
|                    | T4                           | 117 ( 38.0)                          | 67 ( 36.8)                     | 25 ( 35.2)                  |          |
| N_stage (%)        | N0                           | 99 ( 32.1)                           | 70 ( 38.5)                     | 24 ( 33.8)                  | 0.775    |
|                    | N1                           | 56 ( 18.2)                           | 28 ( 15.4)                     | 11 ( 15.5)                  |          |
|                    | N2                           | 52 ( 16.9)                           | 24 ( 13.2)                     | 13 ( 18.3)                  |          |
|                    | N3                           | 101 ( 32.8)                          | 60 ( 33.0)                     | 23 ( 32.4)                  |          |
| M_stage (%)        | M0                           | 265 ( 86.0)                          | 167 ( 91.8)                    | 58 ( 81.7)                  | 0.057    |
|                    | M1                           | 43 ( 14.0)                           | 15 ( 8.2)                      | 13 ( 18.3)                  |          |
| Sex (%)            | Male                         | 142 ( 46.1)                          | 94 ( 51.6)                     | 51 ( 71.8)                  | $<0.001$ |
|                    | Female                       | 166 ( 53.9)                          | 88 ( 48.4)                     | 20 ( 28.2)                  |          |
| Tumorsize (%)      | $<3\text{cm}$                | 66 ( 21.4)                           | 47 ( 25.8)                     | 18 ( 25.4)                  | 0.38     |
|                    | $3\text{cm}\leq <6\text{cm}$ | 97 ( 31.5)                           | 55 ( 30.2)                     | 16 ( 22.5)                  |          |
|                    | $\geq 6\text{cm}$            | 84 ( 27.3)                           | 55 ( 30.2)                     | 25 ( 35.2)                  |          |
|                    | unknown                      | 61 ( 19.8)                           | 25 ( 13.7)                     | 12 ( 16.9)                  |          |
| Surgery_status (%) | Surgery not performed        | 11 ( 3.6)                            | 3 ( 1.6)                       | 1 ( 1.4)                    | 0.345    |
|                    | Surgery performed            | 297 ( 96.4)                          | 179 ( 98.4)                    | 70 ( 98.6)                  |          |
| Bone_M (%)         | No                           | 306 ( 99.4)                          | 181 ( 99.5)                    | 70 ( 98.6)                  | 0.118    |
|                    | Unknown                      | 0 ( 0.0)                             | 0 ( 0.0)                       | 1 ( 1.4)                    |          |
|                    | Yes                          | 2 ( 0.6)                             | 1 ( 0.5)                       | 0 ( 0.0)                    |          |
| Brain_M (%)        | No                           | 308 (100.0)                          | 181 ( 99.5)                    | 70 ( 98.6)                  | 0.173    |
|                    | Unknown                      | 0 ( 0.0)                             | 1 ( 0.5)                       | 1 ( 1.4)                    |          |
| Liver_M (%)        | No                           | 307 ( 99.7)                          | 182 (100.0)                    | 70 ( 98.6)                  | 0.102    |
|                    | Unknown                      | 0 ( 0.0)                             | 0 ( 0.0)                       | 1 ( 1.4)                    |          |
|                    | Yes                          | 1 ( 0.3)                             | 0 ( 0.0)                       | 0 ( 0.0)                    |          |
| Lung_M (%)         | No                           | 307 ( 99.7)                          | 182 (100.0)                    | 70 ( 98.6)                  | 0.102    |
|                    | Unknown                      | 0 ( 0.0)                             | 0 ( 0.0)                       | 1 ( 1.4)                    |          |

|                       |                                             | Yes        | 1 ( 0.3)   | 0 ( 0.0)   | 0 ( 0.0) |  |
|-----------------------|---------------------------------------------|------------|------------|------------|----------|--|
| Tumor_position<br>(%) | C16.0-Cardia, NOS                           | 44 ( 14.3) | 31 ( 17.0) | 7 ( 9.9)   | 0.539    |  |
|                       | C16.1-Fundus of stomach                     | 10 ( 3.2)  | 5 ( 2.7)   | 5 ( 7.0)   |          |  |
|                       | C16.2-Body of stomach                       | 28 ( 9.1)  | 16 ( 8.8)  | 8 ( 11.3)  |          |  |
|                       | C16.3-Gastric antrum                        | 99 ( 32.1) | 58 ( 31.9) | 16 ( 22.5) |          |  |
|                       | C16.4-Pylorus                               | 12 ( 3.9)  | 6 ( 3.3)   | 0 ( 0.0)   |          |  |
|                       | C16.5-Lesser curvature of stomach<br>NOS    | 34 ( 11.0) | 14 ( 7.7)  | 10 ( 14.1) |          |  |
|                       | C16.6-Greater curvature of stom-<br>ach NOS | 17 ( 5.5)  | 10 ( 5.5)  | 3 ( 4.2)   |          |  |
|                       | C16.8-Overlapping lesion of stom-<br>ach    | 37 ( 12.0) | 24 ( 13.2) | 13 ( 18.3) |          |  |
|                       | C16.9-Stomach, NOS                          | 27 ( 8.8)  | 18 ( 9.9)  | 9 ( 12.7)  |          |  |

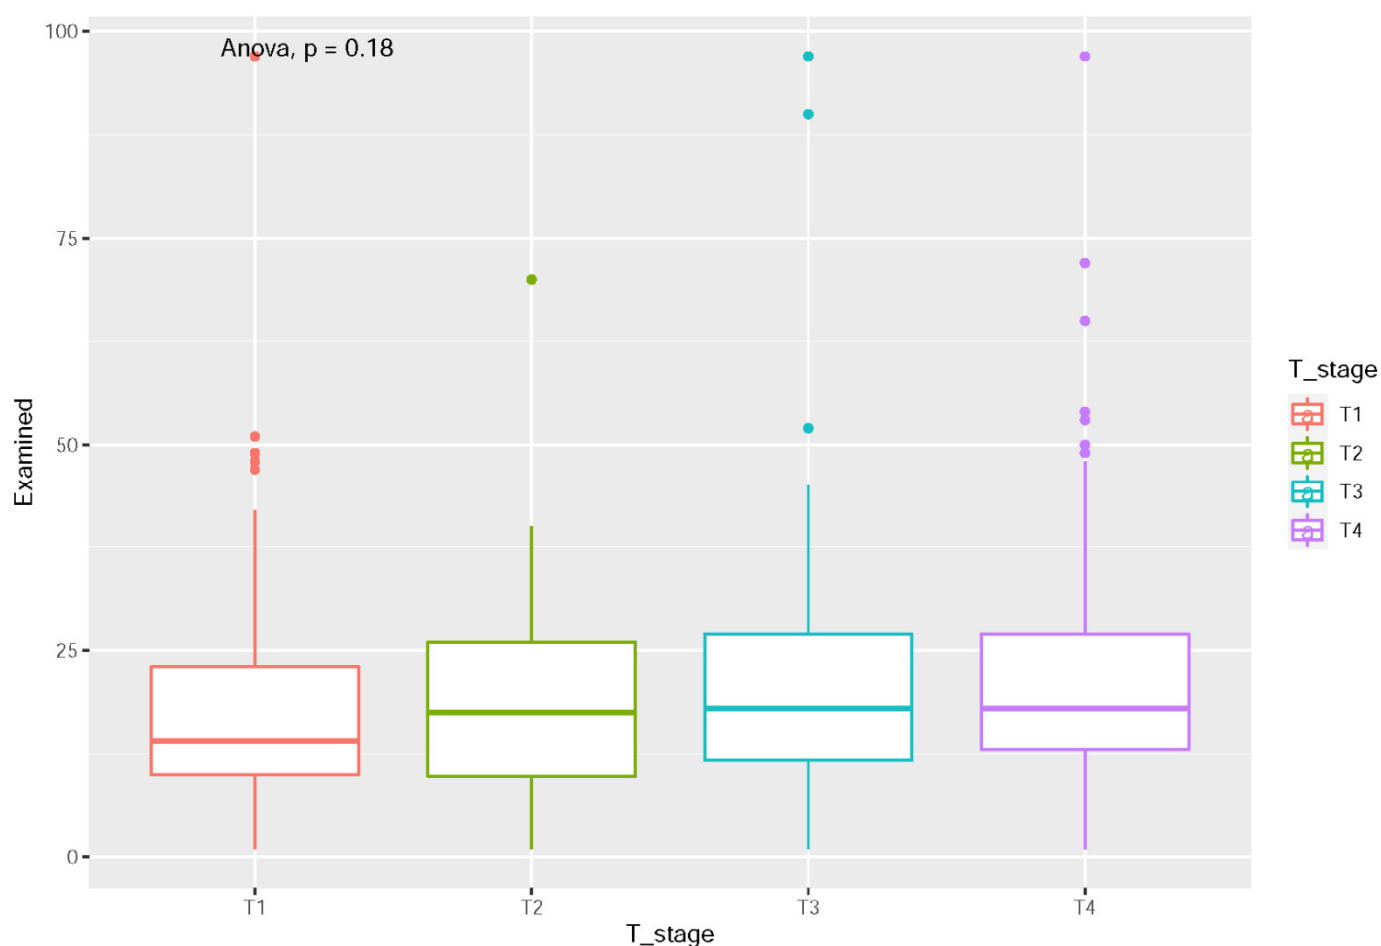

**Figure S1.** Boxplot of number of examined lymph nodes across various T stage.

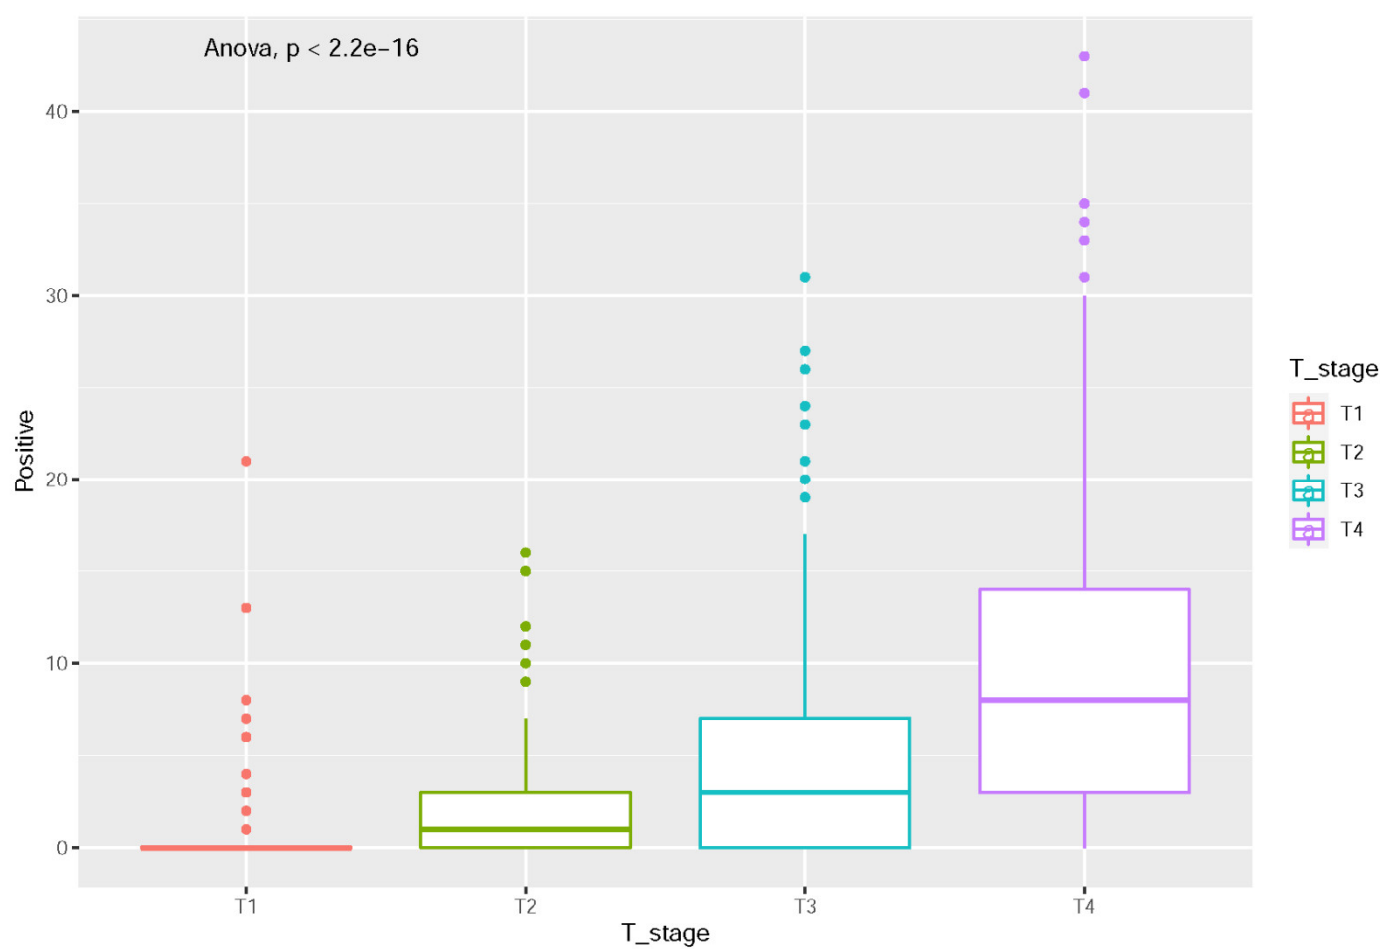

**Figure S2.** Boxplot of number of positive lymph nodes across various T stage.
